# Supplementary figures and images for: A tranilast and BMP-2 based functional bilayer membrane is effective for the prevention of epidural fibrosis during spinal lamina reconstruction
Source: Royal Society of Chemistry journal article supplement (doi:10.1039/c8tb03071e), 2019-01-01

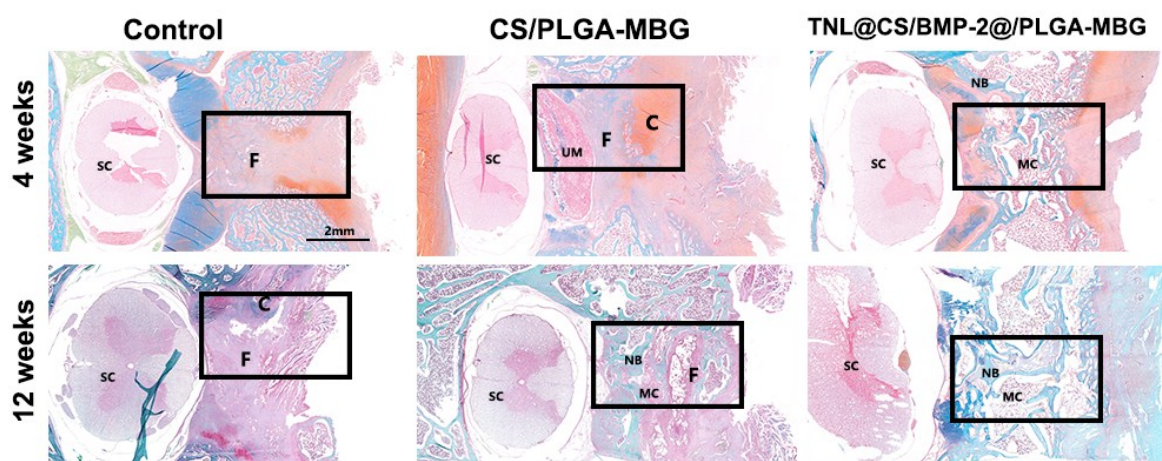

Fig. S1

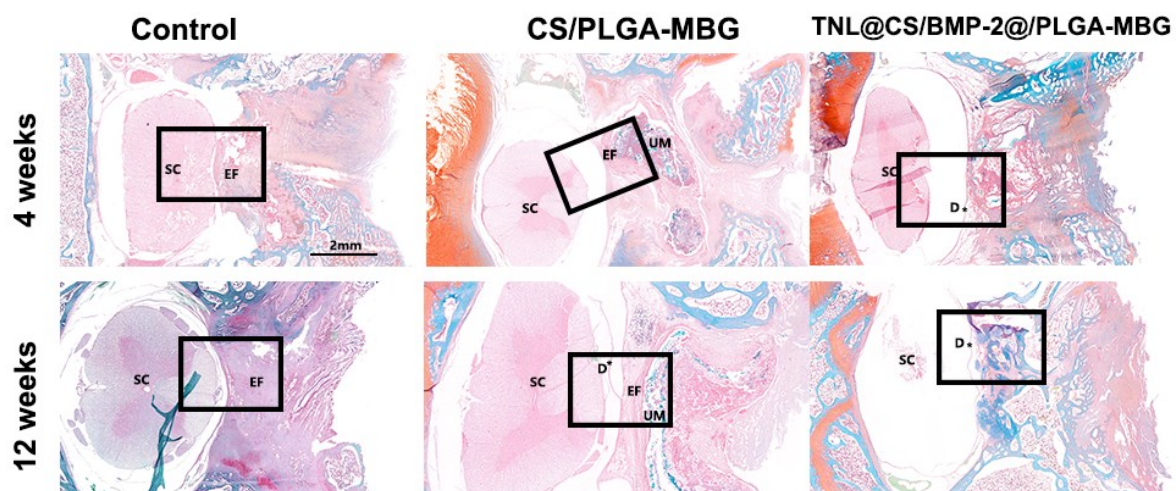

Fig. S2

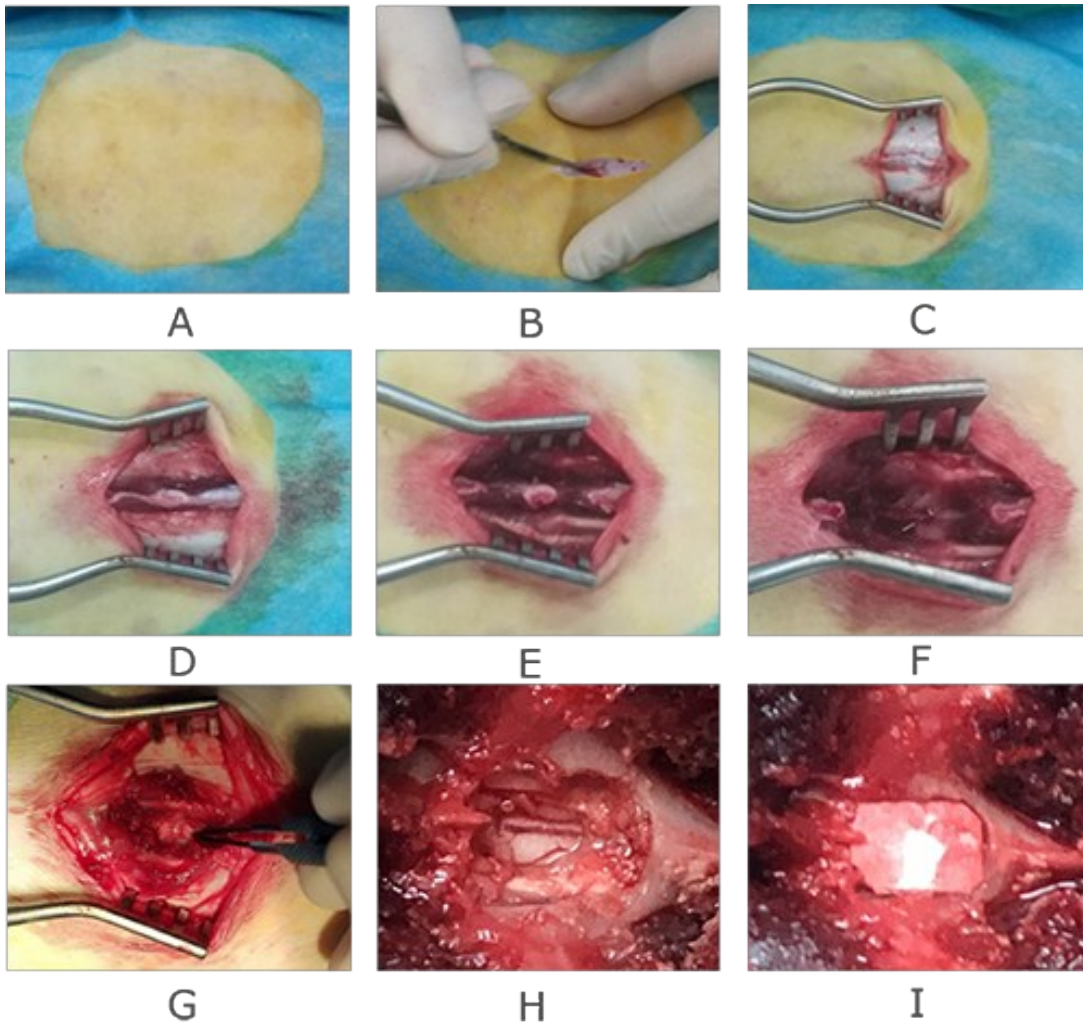

Fig. S3

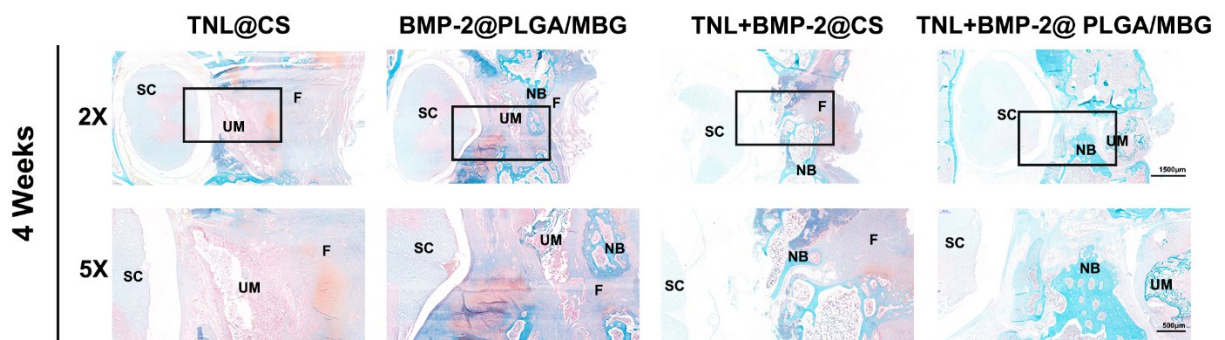

Fig. S4

Supplement: c8tb03071e1.pdf [file c8tb03071e1.pdf]
